# Supplementary material for: An Integrated Approach Exploring the Synergistic Mechanism of Herbal Pairs in a Botanical Dietary Supplement: A Case Study of a Liver Protection Health Food
Source: Int J Genomics. 2020 Apr 9;2020:9054192. doi: 10.1155/2020/9054192 (PMC7171619; doi:10.1155/2020/9054192)
Supplement: Supplementary Materials — Supplementary Table S1: significant KEGG pathways of Shaoyao and Gancao for liver protection. [file 9054192.f1.xls]

## Sheet: S1
Supplementary Tablet S1. Significant KEGG pathways of Shaoyao and Gancao for liver protection.
Pathway Name	Pathway ID	Pvalue	Pvalue_adjusted	Genes	Count
AGE-RAGE signaling pathway in diabetic complications	hsa04933	1.96e-11	3.53e-09	BCL2|1;ICAM1|1;NFKB1|1;CASP3|1;TNF|1;CXCL8|1;IL6|1;MAPK14|1;MAPK8|1;PRKCA|1;PRKCD|1;SERPINE1|1	12
Chemical carcinogenesis	hsa05204	3.83e-11	3.53e-09	CYP2C19|1;CYP2C8|1;CYP2C9|1;CYP3A4|1;CYP3A5|1;HSD11B1|1;UGT1A1|1;UGT2B7|1;AKR1C2|1;CYP1A1|1;GSTP1|1	11
Pertussis	hsa05133	3.44e-10	1.96e-08	ITGB2|1;NFKB1|1;CASP3|1;TNF|1;CD14|1;CXCL8|1;IL6|1;MAPK14|1;MAPK8|1;TLR4|1	10
Legionellosis	hsa05134	4.26e-10	1.96e-08	ITGB2|1;NFKB1|1;TLR2|1;CASP3|1;TNF|1;CD14|1;CXCL8|1;IL6|1;TLR4|1	9
Amoebiasis	hsa05146	6.15e-09	2.26e-07	ITGB2|1;NFKB1|1;TLR2|1;CASP3|1;TNF|1;CD14|1;CXCL8|1;IL6|1;PRKCA|1;TLR4|1	10
Chagas disease (American trypanosomiasis)	hsa05142	9.04e-09	2.77e-07	NFKB1|1;TLR2|1;TNF|1;CXCL8|1;IL2|1;IL6|1;MAPK14|1;MAPK8|1;SERPINE1|1;TLR4|1	10
Tuberculosis	hsa05152	1.58e-08	4.16e-07	BCL2|1;ITGB2|1;NFKB1|1;SRC|1;TLR2|1;CASP3|1;TNF|1;CD14|1;IL6|1;MAPK14|1;MAPK8|1;TLR4|1	12
Hepatitis B	hsa05161	2.02e-08	4.64e-07	BCL2|1;NFKB1|1;SRC|1;TLR2|1;CASP3|1;TNF|1;CXCL8|1;IL6|1;MAPK8|1;PRKCA|1;TLR4|1	11
Toxoplasmosis	hsa05145	3.35e-08	6.86e-07	BCL2|1;BCL2L1|1;NFKB1|1;TLR2|1;CASP3|1;TNF|1;MAPK14|1;MAPK8|1;PDPK1|1;TLR4|1	10
Drug metabolism - cytochrome P450	hsa00982	7.17e-08	1.32e-06	CYP2C19|1;CYP2C8|1;CYP2C9|1;CYP3A4|1;CYP3A5|1;UGT1A1|1;UGT2B7|1;GSTP1|1	8
Bile secretion	hsa04976	9e-08	1.51e-06	ABCC2|1;CYP3A4|1;HMGCR|1;ABCB1|1;ABCB11|1;ATP1A1|1;SLCO1B1|1;ABCB4|1	8
Metabolism of xenobiotics by cytochrome P450	hsa00980	1.12e-07	1.62e-06	CYP2C9|1;CYP3A4|1;CYP3A5|1;HSD11B1|1;UGT1A1|1;UGT2B7|1;CYP1A1|1;GSTP1|1	8
Malaria	hsa05144	1.15e-07	1.62e-06	ICAM1|1;ITGB2|1;TLR2|1;TNF|1;CXCL8|1;IL6|1;TLR4|1	7
Toll-like receptor signaling pathway	hsa04620	1.6e-07	2.1e-06	NFKB1|1;TLR2|1;TNF|1;CD14|1;CXCL8|1;IL6|1;MAPK14|1;MAPK8|1;TLR4|1	9
Insulin resistance	hsa04931	2.03e-07	2.49e-06	NFKB1|1;PPARGC1A|1;PTPN1|1;TNF|1;IL6|1;MAPK8|1;NR1H2|1;PDPK1|1;PRKCD|1	9
Steroid hormone biosynthesis	hsa00140	3.79e-07	4.36e-06	CYP3A4|1;CYP3A5|1;HSD11B1|1;UGT1A1|1;UGT2B7|1;AKR1C2|1;CYP1A1|1	7
Rheumatoid arthritis	hsa05323	6.34e-07	6.86e-06	ICAM1|1;ITGB2|1;TLR2|1;TNF|1;CXCL8|1;IL6|1;MMP3|1;TLR4|1	8
NF-kappa B signaling pathway	hsa04064	7.5e-07	7.66e-06	BCL2|1;BCL2L1|1;ICAM1|1;NFKB1|1;TNF|1;CD14|1;CXCL8|1;TLR4|1	8
Retinol metabolism	hsa00830	8.4e-07	8.13e-06	CYP2C8|1;CYP2C9|1;CYP3A4|1;CYP3A5|1;UGT1A1|1;UGT2B7|1;CYP1A1|1	7
Inflammatory bowel disease (IBD)	hsa05321	9.33e-07	8.59e-06	NFKB1|1;TLR2|1;TNF|1;IL2|1;IL6|1;RORA|1;TLR4|1	7
TNF signaling pathway	hsa04668	2.71e-06	2.37e-05	ICAM1|1;NFKB1|1;CASP3|1;TNF|1;IL6|1;MAPK14|1;MAPK8|1;MMP3|1	8
Salmonella infection	hsa05132	5.67e-06	4.74e-05	NFKB1|1;CD14|1;CXCL8|1;IL6|1;MAPK14|1;MAPK8|1;TLR4|1	7
NOD-like receptor signaling pathway	hsa04621	6.21e-06	4.97e-05	NFKB1|1;TNF|1;CXCL8|1;IL6|1;MAPK14|1;MAPK8|1	6
Influenza A	hsa05164	1.13e-05	8.68e-05	ICAM1|1;NFKB1|1;TNF|1;CXCL8|1;IL6|1;MAPK14|1;MAPK8|1;PRKCA|1;TLR4|1	9
Pathways in cancer	hsa05200	1.44e-05	0.000106	BCL2|1;BCL2L1|1;NFKB1|1;BMP2|1;CASP3|1;FGF2|1;CXCL8|1;GSTP1|1;IL6|1;MAPK8|1;PPARD|1;PPARG|1;PRKCA|1	13
Apoptosis	hsa04210	1.63e-05	0.000115	BCL2|1;BCL2L1|1;NFKB1|1;CASP3|1;TNF|1;MAPK8|1;MCL1|1;PDPK1|1	8
Epithelial cell signaling in Helicobacter pylori infection	hsa05120	1.75e-05	0.000119	NFKB1|1;SRC|1;CASP3|1;CXCL8|1;MAPK14|1;MAPK8|1	6
Leishmaniasis	hsa05140	2.85e-05	0.000187	ITGB2|1;NFKB1|1;TLR2|1;TNF|1;MAPK14|1;TLR4|1	6
Proteoglycans in cancer	hsa05205	3.83e-05	0.000243	SRC|1;TLR2|1;CASP3|1;FGF2|1;TNF|1;MAPK14|1;PDPK1|1;PRKCA|1;TLR4|1	9
Sphingolipid signaling pathway	hsa04071	5.33e-05	0.000327	BCL2|1;NFKB1|1;TNF|1;MAPK14|1;MAPK8|1;PDPK1|1;PRKCA|1	7
Amyotrophic lateral sclerosis (ALS)	hsa05014	5.54e-05	0.000329	BCL2|1;BCL2L1|1;CASP3|1;TNF|1;MAPK14|1	5
Linoleic acid metabolism	hsa00591	8.37e-05	0.000481	CYP2C19|1;CYP2C8|1;CYP2C9|1;CYP3A4|1	4
PI3K-Akt signaling pathway	hsa04151	8.62e-05	0.000481	BCL2|1;BCL2L1|1;NFKB1|1;TLR2|1;FGF2|1;IL2|1;IL6|1;MCL1|1;PDPK1|1;PRKCA|1;TLR4|1	11
Apoptosis - multiple species	hsa04215	0.000141	0.000762	BCL2|1;BCL2L1|1;CASP3|1;MAPK8|1	4
African trypanosomiasis	hsa05143	0.000178	0.000909	ICAM1|1;TNF|1;IL6|1;PRKCA|1	4
Shigellosis	hsa05131	0.000178	0.000909	NFKB1|1;SRC|1;CXCL8|1;MAPK14|1;MAPK8|1	5
HIF-1 signaling pathway	hsa04066	0.000183	0.000909	BCL2|1;NFKB1|1;IL6|1;PRKCA|1;SERPINE1|1;TLR4|1	6
Fc epsilon RI signaling pathway	hsa04664	0.000221	0.00107	TNF|1;MAPK14|1;MAPK8|1;PDPK1|1;PRKCA|1	5
HTLV-I infection	hsa05166	0.000231	0.00109	BCL2L1|1;ICAM1|1;ITGB2|1;NFKB1|1;TNF|1;CHEK1|1;IL2|1;IL6|1;MAPK8|1	9
RIG-I-like receptor signaling pathway	hsa04622	0.000253	0.00117	NFKB1|1;TNF|1;CXCL8|1;MAPK14|1;MAPK8|1	5
Neurotrophin signaling pathway	hsa04722	0.000419	0.00188	BCL2|1;NFKB1|1;MAPK14|1;MAPK8|1;PDPK1|1;PRKCD|1	6
ABC transporters	hsa02010	0.000476	0.00209	ABCC2|1;ABCB1|1;ABCB11|1;ABCB4|1	4
Transcriptional misregulation in cancer	hsa05202	0.000627	0.00268	BCL2L1|1;NFKB1|1;CD14|1;CXCL8|1;IL6|1;MMP3|1;PPARG|1	7
Hepatitis C	hsa05160	0.000725	0.00303	NFKB1|1;TNF|1;CXCL8|1;MAPK14|1;MAPK8|1;PDPK1|1	6
GnRH signaling pathway	hsa04912	0.000854	0.00349	SRC|1;MAPK14|1;MAPK8|1;PRKCA|1;PRKCD|1	5
MAPK signaling pathway	hsa04010	0.00104	0.00417	NFKB1|1;CASP3|1;FGF2|1;TNF|1;CD14|1;MAPK14|1;MAPK8|1;PRKCA|1	8
Inflammatory mediator regulation of TRP channels	hsa04750	0.00119	0.00467	SRC|1;MAPK14|1;MAPK8|1;PRKCA|1;PRKCD|1	5
Adrenergic signaling in cardiomyocytes	hsa04261	0.00131	0.00503	BCL2|1;ATP1A1|1;MAPK14|1;PRKCA|1;TNNI3|1;TNNT2|1	6
Non-alcoholic fatty liver disease (NAFLD)	hsa04932	0.00141	0.00528	NFKB1|1;CASP3|1;TNF|1;CXCL8|1;IL6|1;MAPK8|1	6
T cell receptor signaling pathway	hsa04660	0.00162	0.00598	NFKB1|1;TNF|1;IL2|1;MAPK14|1;PDPK1|1	5
Serotonergic synapse	hsa04726	0.00216	0.00779	CYP2C19|1;CYP2C8|1;CYP2C9|1;CASP3|1;PRKCA|1	5
Adipocytokine signaling pathway	hsa04920	0.00252	0.0089	NFKB1|1;PPARGC1A|1;TNF|1;MAPK8|1	4
PPAR signaling pathway	hsa03320	0.00279	0.00951	LPL|1;PDPK1|1;PPARD|1;PPARG|1	4
Prolactin signaling pathway	hsa04917	0.00279	0.00951	NFKB1|1;SRC|1;MAPK14|1;MAPK8|1	4
Aldosterone-regulated sodium reabsorption	hsa04960	0.0039	0.0128	ATP1A1|1;PDPK1|1;PRKCA|1	3
Complement and coagulation cascades	hsa04610	0.0039	0.0128	ITGB2|1;F10|1;F2|1;SERPINE1|1	4
Herpes simplex infection	hsa05168	0.00401	0.013	NFKB1|1;TLR2|1;CASP3|1;TNF|1;IL6|1;MAPK8|1	6
Osteoclast differentiation	hsa04380	0.0044	0.014	NFKB1|1;TNF|1;MAPK14|1;MAPK8|1;PPARG|1	5
Hypertrophic cardiomyopathy (HCM)	hsa05410	0.00466	0.0145	TNF|1;IL6|1;TNNI3|1;TNNT2|1	4
Graft-versus-host disease	hsa05332	0.00482	0.0146	TNF|1;IL2|1;IL6|1	3
Natural killer cell mediated cytotoxicity	hsa04650	0.00484	0.0146	ICAM1|1;ITGB2|1;CASP3|1;TNF|1;PRKCA|1	5
Measles	hsa05162	0.00499	0.0148	NFKB1|1;TLR2|1;IL2|1;IL6|1;TLR4|1	5
Prostate cancer	hsa05215	0.00597	0.0174	BCL2|1;NFKB1|1;GSTP1|1;PDPK1|1	4
Drug metabolism - other enzymes	hsa00983	0.00623	0.0179	CYP3A4|1;UGT1A1|1;UGT2B7|1	3
Type II diabetes mellitus	hsa04930	0.00701	0.0199	TNF|1;MAPK8|1;PRKCD|1	3
Jak-STAT signaling pathway	hsa04630	0.00931	0.026	BCL2|1;BCL2L1|1;IL2|1;IL6|1;MCL1|1	5
Pathogenic Escherichia coli infection	hsa05130	0.0102	0.0281	CD14|1;PRKCA|1;TLR4|1	3
Viral myocarditis	hsa05416	0.0129	0.0345	ICAM1|1;ITGB2|1;CASP3|1	3
mTOR signaling pathway	hsa04150	0.0129	0.0345	TNF|1;PDPK1|1;PRKCA|1	3
VEGF signaling pathway	hsa04370	0.0135	0.0356	SRC|1;MAPK14|1;PRKCA|1	3
Arachidonic acid metabolism	hsa00590	0.0141	0.0361	CYP2C19|1;CYP2C8|1;CYP2C9|1	3
Colorectal cancer	hsa05210	0.0141	0.0361	BCL2|1;CASP3|1;MAPK8|1	3
Thyroid hormone signaling pathway	hsa04919	0.0157	0.0392	SRC|1;ATP1A1|1;PDPK1|1;PRKCA|1	4
Leukocyte transendothelial migration	hsa04670	0.0157	0.0392	ICAM1|1;ITGB2|1;MAPK14|1;PRKCA|1	4
Pancreatic cancer	hsa05212	0.0167	0.041	BCL2L1|1;NFKB1|1;MAPK8|1	3
p53 signaling pathway	hsa04115	0.0188	0.0456	CASP3|1;CHEK1|1;SERPINE1|1	3
AMPK signaling pathway	hsa04152	0.0191	0.0456	HMGCR|1;PPARGC1A|1;PDPK1|1;PPARG|1	4
Ascorbate and aldarate metabolism	hsa00053	0.0204	0.0482	UGT1A1|1;UGT2B7|1	2

## Sheet: S2
Supplementary Tablet S2. Significant clustered KEGGE pathways of Shaoyao and Gancao for liver protection
GOID	GOTerm	Cluster	Term PValue	Term PValue Corrected with Bonferroni step down	Group PValue	Group PValue Corrected with Bonferroni step down	GOGroups	% Associated Genes	Nr. Genes	Genes Cluster #1	Genes Cluster #2	%Genes Cluster #1	%Genes Cluster #2	Associated Genes Found
KEGG:02010	ABC transporters	Specific for Cluster Gancao	1.47254e-06	1.03078e-05	1.19073e-08	3.5722e-08	Group1	13.3333	6	[ABCB1, ABCB11, ABCC1, ABCC2, CFTR]	[ABCB4]	83.3333	16.6667	[ABCB1, ABCB11, ABCB4, ABCC1, ABCC2, CFTR]
KEGG:04976	Bile secretion	Specific for Cluster Gancao	5.07904e-09	1.01581e-07	1.19073e-08	3.5722e-08	Group1	12.5	9	[ABCB1, ABCB11, ABCC2, ATP1A1, CFTR, CYP3A4, HMGCR, SLCO1B1]	[ABCB4]	88.8889	11.1111	[ABCB1, ABCB11, ABCB4, ABCC2, ATP1A1, CFTR, CYP3A4, HMGCR, SLCO1B1]
KEGG:00140	Steroid hormone biosynthesis	Specific for Cluster Gancao	4.71844e-07	5.66213e-06	4.92589e-08	9.85177e-08	Group2	11.6667	7	[AKR1C2, CYP1A1, CYP3A4, CYP3A5, HSD11B1, UGT1A1, UGT2B7]	[]	100	0	[AKR1C2, CYP1A1, CYP3A4, CYP3A5, HSD11B1, UGT1A1, UGT2B7]
KEGG:00830	Retinol metabolism	Specific for Cluster Gancao	1.01604e-06	8.12836e-06	4.92589e-08	9.85177e-08	Group2	10.4478	7	[CYP1A1, CYP2C8, CYP2C9, CYP3A4, CYP3A5, UGT1A1, UGT2B7]	[]	100	0	[CYP1A1, CYP2C8, CYP2C9, CYP3A4, CYP3A5, UGT1A1, UGT2B7]
KEGG:00980	Metabolism of xenobiotics by cytochrome P450	Specific for Cluster Gancao	1.52259e-07	2.13163e-06	4.92589e-08	9.85177e-08	Group2	10.5263	8	[CYP1A1, CYP2C9, CYP3A4, CYP3A5, HSD11B1, UGT1A1, UGT2B7]	[GSTP1]	87.5	12.5	[CYP1A1, CYP2C9, CYP3A4, CYP3A5, GSTP1, HSD11B1, UGT1A1, UGT2B7]
KEGG:00982	Drug metabolism	Specific for Cluster Gancao	9.91481e-08	1.58637e-06	4.92589e-08	9.85177e-08	Group2	11.1111	8	[CYP2C19, CYP2C8, CYP2C9, CYP3A4, CYP3A5, UGT1A1, UGT2B7]	[GSTP1]	87.5	12.5	[CYP2C19, CYP2C8, CYP2C9, CYP3A4, CYP3A5, GSTP1, UGT1A1, UGT2B7]
KEGG:05204	Chemical carcinogenesis	Specific for Cluster Gancao	3.87026e-11	9.28862e-10	4.92589e-08	9.85177e-08	Group2	13.4146	11	[AKR1C2, CYP1A1, CYP2C19, CYP2C8, CYP2C9, CYP3A4, CYP3A5, HSD11B1, UGT1A1, UGT2B7]	[GSTP1]	90.9091	9.09091	[AKR1C2, CYP1A1, CYP2C19, CYP2C8, CYP2C9, CYP3A4, CYP3A5, GSTP1, HSD11B1, UGT1A1, UGT2B7]
KEGG:05410	Hypertrophic cardiomyopathy (HCM)	Specific for Cluster Shaoyao	0.000680434	0.000680434	0.000680434	0.000680434	Group0	5.74713	5	[]	[IL6, TNF, TNNC1, TNNI3, TNNT2]	0	100	[IL6, TNF, TNNC1, TNNI3, TNNT2]
KEGG:04066	HIF-1 signaling pathway	Specific for Cluster Shaoyao	1.51492e-05	4.54477e-05	1.03292e-10	4.13167e-10	Group3	7	7	[BCL2, NFKB1]	[IL6, PRKCA, SERPINE1, TLR4, VEGFA]	28.5714	71.4286	[BCL2, IL6, NFKB1, PRKCA, SERPINE1, TLR4, VEGFA]
KEGG:04620	Toll-like receptor signaling pathway	Specific for Cluster Shaoyao	1.33763e-07	2.00644e-06	1.03292e-10	4.13167e-10	Group3	8.65385	9	[NFKB1, TLR2]	[CD14, CXCL8, IL6, MAPK14, MAPK8, TLR4, TNF]	22.2222	77.7778	[CD14, CXCL8, IL6, MAPK14, MAPK8, NFKB1, TLR2, TLR4, TNF]
KEGG:04625	C-type lectin receptor signaling pathway	Specific for Cluster Shaoyao	1.73934e-06	1.04361e-05	1.03292e-10	4.13167e-10	Group3	7.69231	8	[NFKB1, SRC]	[IL2, IL6, MAPK14, MAPK8, PRKCD, TNF]	25	75	[IL2, IL6, MAPK14, MAPK8, NFKB1, PRKCD, SRC, TNF]
KEGG:04657	IL-17 signaling pathway	Specific for Cluster Shaoyao	7.37768e-07	7.37768e-06	1.03292e-10	4.13167e-10	Group3	8.60215	8	[NFKB1]	[CASP3, CXCL8, IL6, MAPK14, MAPK8, MMP3, TNF]	12.5	87.5	[CASP3, CXCL8, IL6, MAPK14, MAPK8, MMP3, NFKB1, TNF]
KEGG:04664	Fc epsilon RI signaling pathway	Specific for Cluster Shaoyao	0.000216173	0.000432346	1.03292e-10	4.13167e-10	Group3	7.35294	5	[]	[MAPK14, MAPK8, PDPK1, PRKCA, TNF]	0	100	[MAPK14, MAPK8, PDPK1, PRKCA, TNF]
KEGG:04668	TNF signaling pathway	Specific for Cluster Shaoyao	2.66259e-06	1.3313e-05	1.03292e-10	4.13167e-10	Group3	7.27273	8	[ICAM1, NFKB1]	[CASP3, IL6, MAPK14, MAPK8, MMP3, TNF]	25	75	[CASP3, ICAM1, IL6, MAPK14, MAPK8, MMP3, NFKB1, TNF]
KEGG:04931	Insulin resistance	Specific for Cluster Shaoyao	1.85643e-07	2.41335e-06	1.03292e-10	4.13167e-10	Group3	8.33333	9	[NFKB1, PPARGC1A]	[IL6, MAPK8, NR1H2, PDPK1, PRKCD, PTPN1, TNF]	22.2222	77.7778	[IL6, MAPK8, NFKB1, NR1H2, PDPK1, PPARGC1A, PRKCD, PTPN1, TNF]
KEGG:04933	AGE-RAGE signaling pathway in diabetic complications	Specific for Cluster Shaoyao	8.0888e-13	2.0222e-11	1.03292e-10	4.13167e-10	Group3	13	13	[BCL2, ICAM1, NFKB1]	[CASP3, CXCL8, IL6, MAPK14, MAPK8, PRKCA, PRKCD, SERPINE1, TNF, VEGFA]	23.0769	76.9231	[BCL2, CASP3, CXCL8, ICAM1, IL6, MAPK14, MAPK8, NFKB1, PRKCA, PRKCD, SERPINE1, TNF, VEGFA]
KEGG:05132	Salmonella infection	Specific for Cluster Shaoyao	5.56055e-06	2.22422e-05	1.03292e-10	4.13167e-10	Group3	8.13953	7	[NFKB1]	[CD14, CXCL8, IL6, MAPK14, MAPK8, TLR4]	14.2857	85.7143	[CD14, CXCL8, IL6, MAPK14, MAPK8, NFKB1, TLR4]
KEGG:05133	Pertussis	Specific for Cluster Shaoyao	3.93422e-10	9.0487e-09	1.03292e-10	4.13167e-10	Group3	13.1579	10	[ITGB2, NFKB1]	[CASP3, CD14, CXCL8, IL6, MAPK14, MAPK8, TLR4, TNF]	20	80	[CASP3, CD14, CXCL8, IL6, ITGB2, MAPK14, MAPK8, NFKB1, TLR4, TNF]
KEGG:05134	Legionellosis	Specific for Cluster Shaoyao	4.22702e-10	9.29943e-09	1.03292e-10	4.13167e-10	Group3	16.3636	9	[ITGB2, NFKB1, TLR2]	[CASP3, CD14, CXCL8, IL6, TLR4, TNF]	33.3333	66.6667	[CASP3, CD14, CXCL8, IL6, ITGB2, NFKB1, TLR2, TLR4, TNF]
KEGG:05135	Yersinia infection	Specific for Cluster Shaoyao	4.93578e-07	5.42935e-06	1.03292e-10	4.13167e-10	Group3	7.43802	9	[NFKB1, SRC]	[CXCL8, IL2, IL6, MAPK14, MAPK8, TLR4, TNF]	22.2222	77.7778	[CXCL8, IL2, IL6, MAPK14, MAPK8, NFKB1, SRC, TLR4, TNF]
KEGG:05142	Chagas disease (American trypanosomiasis)	Specific for Cluster Shaoyao	8.19929e-09	1.55787e-07	1.03292e-10	4.13167e-10	Group3	9.70874	10	[NFKB1, TLR2]	[CXCL8, IL2, IL6, MAPK14, MAPK8, SERPINE1, TLR4, TNF]	20	80	[CXCL8, IL2, IL6, MAPK14, MAPK8, NFKB1, SERPINE1, TLR2, TLR4, TNF]
KEGG:05145	Toxoplasmosis	Specific for Cluster Shaoyao	2.02573e-08	3.64632e-07	1.03292e-10	4.13167e-10	Group3	8.84956	10	[BCL2, BCL2L1, NFKB1, TLR2]	[CASP3, MAPK14, MAPK8, PDPK1, TLR4, TNF]	40	60	[BCL2, BCL2L1, CASP3, MAPK14, MAPK8, NFKB1, PDPK1, TLR2, TLR4, TNF]
KEGG:05146	Amoebiasis	Specific for Cluster Shaoyao	3.69411e-09	7.75764e-08	1.03292e-10	4.13167e-10	Group3	10.5263	10	[ITGB2, NFKB1, TLR2]	[CASP3, CD14, CXCL8, IL6, PRKCA, TLR4, TNF]	30	70	[CASP3, CD14, CXCL8, IL6, ITGB2, NFKB1, PRKCA, TLR2, TLR4, TNF]
KEGG:05321	Inflammatory bowel disease (IBD)	Specific for Cluster Shaoyao	8.2384e-07	7.41456e-06	1.03292e-10	4.13167e-10	Group3	10.7692	7	[NFKB1, TLR2]	[IL2, IL6, RORA, TLR4, TNF]	28.5714	71.4286	[IL2, IL6, NFKB1, RORA, TLR2, TLR4, TNF]
KEGG:05323	Rheumatoid arthritis	Specific for Cluster Shaoyao	4.14487e-08	7.04628e-07	1.03292e-10	4.13167e-10	Group3	9.89011	9	[ICAM1, ITGB2, TLR2]	[CXCL8, IL6, MMP3, TLR4, TNF, VEGFA]	33.3333	66.6667	[CXCL8, ICAM1, IL6, ITGB2, MMP3, TLR2, TLR4, TNF, VEGFA]
